# Supplementary material for: Apolipoprotein A-IV concentrations and cancer in a large cohort of chronic kidney disease patients: results from the GCKD study
Source: PubMed Central journal article supplement (PMC10921727; doi:10.1186/s12885-024-12053-8), 2024-03-07
Supplement: 12885_2024_12053_MOESM1_ESM.pdf [file 12885_2024_12053_MOESM1_ESM.pdf]

## Supplementary Tables to

### **Apolipoprotein A-IV concentrations and cancer in a large cohort of chronic kidney disease patients: results from the GCKD study**

*Barbara Kollerits<sup>1</sup>, Simon Gruber<sup>1</sup>, Inga Steinbrenner<sup>3</sup>, Johannes P. Schwaiger<sup>1</sup>,  
Hansi Weissensteiner<sup>1</sup>, Sebastian Schönherr<sup>1</sup>, Lukas Forer<sup>1</sup>, Fruzsina Kotsis<sup>2,4</sup>,  
Ulla T. Schultheiss<sup>2,4</sup>, Heike Meiselbach<sup>3</sup>, Christoph Wanner<sup>5</sup>,  
Kai-Uwe Eckardt<sup>3,6</sup>, Florian Kronenberg<sup>1</sup>; for the GCKD Investigators*

<sup>1</sup> *Institute of Genetic Epidemiology, Medical University of Innsbruck, Innsbruck, Austria*

<sup>2</sup> *Institute of Genetic Epidemiology, Faculty of Medicine and Medical Center - University of Freiburg, Freiburg, Germany*

<sup>3</sup> *Department of Nephrology and Hypertension, University Hospital Erlangen, Friedrich-Alexander-Universität Erlangen-Nürnberg, Erlangen, Germany and German Chronic Kidney Disease study*

<sup>4</sup> *Department of Medicine IV – Nephrology and Primary Care, Faculty of Medicine and Medical Center - University of Freiburg, Freiburg, Germany*

<sup>5</sup> *Division of Nephrology, Department of Internal Medicine I, University Hospital Würzburg, Würzburg, Germany*

<sup>6</sup> *Department of Nephrology and Medical Intensive Care, Charité – Universitätsmedizin Berlin, Berlin, Germany*

**Note:** The results presented in this manuscript were part of the diploma thesis of Simon Gruber for graduation at the Medical School of the Medical University of Innsbruck.

#### **Corresponding author:**

Florian Kronenberg, MD  
Institute of Genetic Epidemiology  
Medical University of Innsbruck  
Schöpfstraße 41, A-6020 Innsbruck, Austria.  
Phone: (+43) 512-9003-70560  
Fax: (+43) 512 9003-73560 or -73561,  
Email: [Florian.Kronenberg@i-med.ac.at](mailto:Florian.Kronenberg@i-med.ac.at)

**Supplementary Table 1:** Biomarker studies that investigated apolipoprotein A-IV in various cancer types: **Green letters** in case expression or concentration of apoA-IV is increased, **red letters** in case expression or concentration of apoA-IV is decreased. **Yellow highlighted** are results of studies in which measurement or validation was performed by a quantitative apoA-IV assay.

| Study                                                                   | Design and recruitment                                                                              | Patient numbers                                                       | Material | Method                                                                       | Main results                                                                                                                                                                                                                    |
|-------------------------------------------------------------------------|-----------------------------------------------------------------------------------------------------|-----------------------------------------------------------------------|----------|------------------------------------------------------------------------------|---------------------------------------------------------------------------------------------------------------------------------------------------------------------------------------------------------------------------------|
| <b>Ovarian cancer</b>                                                   |                                                                                                     |                                                                       |          |                                                                              |                                                                                                                                                                                                                                 |
| Dieplinger et al. 2009<br><i>Cancer Epidem Biom Prev</i> <sup>[1]</sup> | Cases – benign gynaecologic conditions – controls                                                   | 181 - 399 - 177                                                       | Plasma   | <b>ELISA</b>                                                                 | ApoA-IV <b>reduced</b> in cases vs. benign gynaecologic conditions vs. controls: 9.4 mg/dl vs. 11.7 mg/dl vs. 13mg/dl; No independent diagnostic information of A-IV to CA125 and age for differentiation of the disease status |
| Lorkova et al. 2012<br><i>Oncology Reports</i> <sup>[2]</sup>           | Cases – controls<br>Before surgery and chemotherapy                                                 | 10 - 10                                                               | Serum    | 1) Proteomic analysis<br>2) <b>Validation ELISA</b>                          | ApoA-IV <b>decreased</b> in 10 cases versus 10 controls (roughly 15 mg/dL vs. 48 mg/dL, estimated from Figure 2 of the publication)                                                                                             |
| Li et al. 2012<br><i>Asian Pac J Cancer Prev</i> <sup>[3]</sup>         | Cancer – benign tumors – controls                                                                   | 21 - 16 - 20                                                          | Serum    | 1) Proteomic analysis<br>2) Validation by Western blot                       | <b>Decreased</b> apoA-IV expression                                                                                                                                                                                             |
| Timms et al. 2014<br><i>Proteomics Clin Appl</i> <sup>[4]</sup>         | A) Cases vs. benign ovarian conditions vs. controls<br>B) Validation by ELISA: malignant vs. benign | A) 22 – 45 – 64<br>B) 22 - 45 from A) and 48 - 22 independent samples | Serum    | A) Proteomic analysis<br>B) <b>Validation in additional samples by ELISA</b> | <b>Lower</b> apoA-IV significantly discriminated benign from malignant but not as good as CA125                                                                                                                                 |
| Rauniyar et al. 2017<br><i>Biomarker Insights</i> <sup>[5]</sup>        | Cases – controls                                                                                    | 6 – 7                                                                 | Serum    | Proteomic analysis                                                           | ApoA-IV significantly <b>decreased</b>                                                                                                                                                                                          |
| <b>Cervical cancer</b>                                                  |                                                                                                     |                                                                       |          |                                                                              |                                                                                                                                                                                                                                 |
| Jeong et al. 2008<br><i>J Gynecol Oncol</i> <sup>[6]</sup>              | Cases – controls                                                                                    | 6 - 6                                                                 | Plasma   | Proteomic analysis                                                           | ApoA-IV precursor <b>downregulated</b>                                                                                                                                                                                          |
| <b>Endometrial cancer</b>                                               |                                                                                                     |                                                                       |          |                                                                              |                                                                                                                                                                                                                                 |
| Wang et al. 2011<br><i>J Haem &amp; Onc</i> <sup>[7]</sup>              | Endometrial lesions various stages - carcinoma - healthy controls                                   | 14 - 6 - 7                                                            | Serum    | Proteomic analysis                                                           | Downregulation of A-IV precursor in complex and atypical endometrial hyperplasia, but not in endometrial carcinoma                                                                                                              |
| <b>Hepatocellular cancer</b>                                            |                                                                                                     |                                                                       |          |                                                                              |                                                                                                                                                                                                                                 |
| Kawakami et al. 2005<br><i>Proteomics</i> <sup>[8]</sup>                | Before and after radiofrequency ablation treatment                                                  | 8                                                                     | Serum    | Proteomic analysis                                                           | ApoA-IV precursor <b>decreased</b> after treatment                                                                                                                                                                              |
| Pleguezuelo et al. 2010<br><i>World J Hepat</i> <sup>[9]</sup>          | Cases versus liver cirrhosis                                                                        | 18 - 22                                                               | Plasma   | Proteomic analysis                                                           | ApoA-IV significantly <b>higher</b> in patients with hepatocellular carcinoma compared to liver cirrhosis                                                                                                                       |
| Sugimoto et al. 2013<br><i>Int J of Mol Med</i> <sup>[10]</sup>         | Hepatitis-C-induced cirrhosis - cirrhosis -hepatocellular carcinoma - controls                      | 24 – 17 - 19 - 19                                                     | Serum    | Proteomic analysis                                                           | <b>Reduced</b> level of apoA-IV isoform in liver cirrhosis and hepatocellular carcinoma                                                                                                                                         |
| Bharali et al. 2018<br><i>Indian J Med Res</i> <sup>[11]</sup>          | Cases - liver cirrhosis - chronic hepatitis - healthy controls                                      | 50 – 25 – 25 - 10                                                     | Plasma   | 1) Western Blot<br>2) <b>Validation by ELISA</b>                             | <b>Decreased</b> apoAIV concentrations in hepatocellular carcinoma compared to liver cirrhosis and chronic hepatitis                                                                                                            |
| <b>Extrahepatic cholangio-carcinoma (CCA)</b>                           |                                                                                                     |                                                                       |          |                                                                              |                                                                                                                                                                                                                                 |
| Son et al. 2020<br><i>J Cancer</i> 2020 <sup>[12]</sup>                 | CCA - benign biliary conditions                                                                     | 18 - 5                                                                | Bile     | Proteomic analysis                                                           | Non-significant increase of apoA-IV expression in <b>bile</b> of CCA patients                                                                                                                                                   |
| <b>Pancreatic cancer</b>                                                |                                                                                                     |                                                                       |          |                                                                              |                                                                                                                                                                                                                                 |
| Abulaizi et al. 2011<br><i>Int J Proteomics</i> <sup>[13]</sup>         | Cases - controls                                                                                    | 32 – 32                                                               | Serum    | 1) Proteomic analysis<br>2) <b>Validation by ELISA</b>                       | ApoA-IV significantly <b>decreased</b> in 15 cases versus 15 controls: 107.8 ± 25.8 vs. 185.3 ± 16.0 arbitrary units                                                                                                            |
| Park et al. 2017<br><i>Oncotarget</i> <sup>[14]</sup>                   | Cases - pancreatitis - controls                                                                     | Discovery: 116 - 31 - 35<br>Validation: 292 - 70 - 94                 | Serum    | Discovery: proteomic and gene expression<br>Validation: proteomic analysis   | Significantly <b>decreased</b> apoA-IV expression in cancer cases                                                                                                                                                               |
| Peng et al. 2020<br><i>Cancers</i> <sup>[15]</sup>                      | Cases – controls                                                                                    | Pilot cohort 10 - 10<br>Testing cohort: 50 - 49                       | Plasma   | Proteomic analysis<br>RNA sequencing                                         | ApoA-IV significantly <b>decreased</b> compared to controls                                                                                                                                                                     |

| Study                                                     | Design and recruitment                                             | Patient numbers                                                   | Material         | Method                                                | Main results                                                                                                         |
|-----------------------------------------------------------|--------------------------------------------------------------------|-------------------------------------------------------------------|------------------|-------------------------------------------------------|----------------------------------------------------------------------------------------------------------------------|
| <b>Gastric cancer</b>                                     |                                                                    |                                                                   |                  |                                                       |                                                                                                                      |
| Liu et al. 2012<br><i>Clin Chim Acta</i> [16]             | Cases - controls                                                   | 20 - 10                                                           | Serum            | Proteomic analysis                                    | ApoA-IV precursor <b>upregulation</b>                                                                                |
| <b>Colorectal cancer</b>                                  |                                                                    |                                                                   |                  |                                                       |                                                                                                                      |
| Sugimachi et al. 2016<br><i>Ann Surg Oncol</i> [17]       | Consecutive primary CRC patients undergoing surgery                | 107                                                               | cDNA             | ApoA-IV gene expression levels                        | <b>Higher mRNA apo A-IV expression</b> was associated with a poor prognosis                                          |
| Ahn et al. 2019<br><i>Clin Proteom</i> [18]               | Cases (different stages) - controls                                | 80 - 20                                                           | Plasma           | Proteomic analysis                                    | <b>Decreased</b> apo A-IV expression in cases                                                                        |
| <b>Colorectal and prostate cancer</b>                     |                                                                    |                                                                   |                  |                                                       |                                                                                                                      |
| Karczmariski et al. 2013<br><i>Acta biochem Pol</i> [19]  | Cancer cases (16 colorectal and 28 prostate cancer) - controls     | 44 - 86                                                           | Serum            | Mass spectrometry of proteolytic fragments            | Two APOA4 peptides were found to be <b>higher</b> in colorectal and prostate cancer compared to controls             |
| <b>Oral cancer</b>                                        |                                                                    |                                                                   |                  |                                                       |                                                                                                                      |
| Chang et al. 2019<br><i>J Food and Drug Anal</i> [20]     | Cases - controls                                                   | 40 cases in test group and 71 cases in validation vs. 55 controls | Plasma           | 1) Proteomic analysis<br>2) Validation by ELISA       | apo A-IV and apo A-IV/total protein ratios were significantly <b>decreased</b> in plasma of patients versus controls |
| <b>Thyroid cancer</b>                                     |                                                                    |                                                                   |                  |                                                       |                                                                                                                      |
| Abdullah et al. 2016<br><i>PeerJ</i> [21]                 | Cases with and without history of benign thyroid goitre - controls | 6 - 8 - 20                                                        | Tissue and serum | Proteomic analysis                                    | <b>Enhanced apoA-IV expression</b> in papillary thyroid cancer patients with history of benign thyroid goitre        |
| Farrokhi Yekta et al. 2018<br><i>Int J Biol Mark</i> [22] | Cases - multinodal goitre - controls<br>Newly diagnosed patients   | 17 - 17 - 20                                                      | Serum            | 1) Proteomic analysis<br>2) Validation by ELISA       | <b>Decreased</b> apoA-IV in papillary thyroid cancer                                                                 |
| Li et al. 2020<br><i>PeerJ 2020</i> [23]                  | Cases - benign nodules - controls                                  | Training: 29 - 15 - 10<br>Validation: 44 - 20 - 15                | Serum            | 1) Proteomic analysis<br>2) Validation by ELISA       | ApoA-IV strongly <b>downregulated</b> in cancer cases but <b>higher</b> concentrations in the validation study       |
| <b>Lung cancer</b>                                        |                                                                    |                                                                   |                  |                                                       |                                                                                                                      |
| Dowling et al. 2007<br><i>Electrophoresis</i> [24]        | 6 cases versus pooled standard of 16 controls                      | 6 versus pooled standard                                          | Serum            | Proteomic analysis                                    | <b>Increased</b> abundance of apoAIV-precursor in cases                                                              |
| Okano et al. 2016<br><i>Int J Canc</i> [25]               | Cases - COPD - healthy smokers<br>Nippon Medical School, Japan     | 11 - 7 - 7                                                        | Serum            | 1) Proteomic analysis<br>2) Western Blot in subsample | <b>Increased</b> apoA-IV expression in lung cancer cases                                                             |
| <b>Acute myeloid leukaemia</b>                            |                                                                    |                                                                   |                  |                                                       |                                                                                                                      |
| Zheng et al. 2017<br><i>Gen &amp; Mol Res</i> [26]        | Cases - controls                                                   | 62 - 15                                                           | Serum            | Proteomic analysis                                    | <b>Decreased</b> apoA-IV expression                                                                                  |
| <b>Glioblastoma</b>                                       |                                                                    |                                                                   |                  |                                                       |                                                                                                                      |
| Miyauchi et al. 2018<br><i>PLOS One</i> [27]              | Cases - controls                                                   | 14 - 15                                                           | Plasma           | Proteomic analysis                                    | ApoA-IV expression significantly <b>decreased</b>                                                                    |
| <b>Bladder cancer</b>                                     |                                                                    |                                                                   |                  |                                                       |                                                                                                                      |
| Soukup et al. 2019<br><i>Neoplasma</i> [28]               | Cases - controls                                                   | 90 - 60                                                           | Urine            | ELISA                                                 | Significantly <b>higher urinary apoA-IV values</b> in cases vs. controls                                             |

**Supplementary Table 2:** Type of cancer observed during the prospective observation period. Only the first event is counted.

| Type of cancer                                                                                                | Number (n=368) |
|---------------------------------------------------------------------------------------------------------------|----------------|
| Renal tract cancers (kidney, bladder, urothelial cancer)                                                      | 61             |
| Male cancers (prostate cancer, others)                                                                        | 55             |
| Digestive system (oesophagus, stomach, small intestine, colon, rectum)                                        | 47             |
| Skin cancer (melanoma, squamous cell carcinoma)                                                               | 49             |
| Female cancers (breast, cervix, uterus, ovary)                                                                | 41             |
| Lung cancer                                                                                                   | 40             |
| Haematological cancers (lymphoma, leukaemia, multiple myeloma, and other malignant haematological conditions) | 33             |
| Abdominal solid organs (liver, gallbladder, biliary tract, pancreas, other digestive organs)                  | 23             |
| Other cancers                                                                                                 | 15             |
| Unknown cancer                                                                                                | 4              |

**Supplementary Table 3:** Baseline characteristics of German Chronic Kidney Disease (GCKD) study patients stratified by quartiles of apolipoprotein A-IV

|                                                                     | Apolipoprotein A-IV quartiles |                           |                           |                           | p-value for trend |
|---------------------------------------------------------------------|-------------------------------|---------------------------|---------------------------|---------------------------|-------------------|
|                                                                     | Quartile 1 (n=1257)           | Quartile 2 (n=1253)       | Quartile 3 (n=1262)       | Quartile 4 (n=1267)       |                   |
| ApoA-IV (mg/dL): range                                              | 5.2-22.0                      | 22.0-27.6                 | 27.6-34.0                 | 34.0-100.2                |                   |
| Mean±SD                                                             | 18.1±3.0                      | 24.8±1.6                  | 30.6±1.8                  | 42.0±7.6                  | -                 |
| 25 <sup>th</sup> , 50 <sup>th</sup> and 75 <sup>th</sup> percentile | [16.2;18.6;20.5]              | [23.4;24.8;26.1]          | [29.0;30.4;32.0]          | [36.5;39.8;45.2]          |                   |
| Age (years)                                                         | 60±12 [52;63;70]              | 61±12 [55;64;70]          | 61±12 [55;64;70]          | 59±12 [51;62;69]          | 0.007             |
| Female gender, n (%)                                                | 573 (46)                      | 487 (39)                  | 476 (38)                  | 469 (37)                  | <0.001            |
| Body mass index, (kg/m <sup>2</sup> )                               | 30.3±6.1 [26.2;29.7;33.6]     | 30.0±6.0 [25.8;29.1;33.5] | 29.9±6.0 [25.9;28.8;33;1] | 29.0±5.6 [25.0;28.2;32.4] | <0.001            |
| Smoker and ex-smoker, n (%)                                         | 702 (56)                      | 707 (57)                  | 759 (60)                  | 798 (63)                  | <0.001            |
| Diabetes, n (%)                                                     | 374 (30)                      | 430 (34)                  | 467 (37)                  | 515 (41)                  | <0.001            |
| Hypertension, n (%)                                                 | 1168 (93)                     | 1210 (97)                 | 1218 (97)                 | 1253 (99)                 | <0.001            |
| Cardiovascular disease, n (%)                                       | 326 (26)                      | 312 (25)                  | 353 (28)                  | 296 (23)                  | 0.35              |
| eGFR Cystatin C (mL/min/1.73m <sup>2</sup> )                        | 60±22 [45;56;72]              | 52±19 [39;50;62]          | 47±18 [35;44;56]          | 40±15 [29;38;49]          | <0.001            |
| eGFR Creatinine (mL/min/1.73m <sup>2</sup> )                        | 58±20 [44;54;67]              | 51±17 [40; 49; 59]        | 47±17 [36; 44; 55]        | 42±14 [31; 40; 48]        | <0.001            |
| UACR (mg/g)                                                         | 199±586 [6;19;106]            | 274±714 [7;31;193]        | 429±974 [11;55;383]       | 815±1285 [39;281;1078]    | <0.001            |
| Statin use, n (%)                                                   | 538 (43)                      | 553 (44)                  | 619 (49)                  | 685 (54)                  | <0.001            |
| Serum albumin,(g/L)                                                 | 39.0±4.0 [36.9;39.3;41.3]     | 38.9±4.0 [36.9;39.1;41.2] | 38.3±4.6 [36.3;38.5;40.6] | 37.3±4.8 [35.2;37.8;40.3] | <0.001            |
| Hemoglobin, (g/dL)                                                  | 13.9±1.7 [12.8;13.9;15.0]     | 13.8±1.6 [12.8;13.8;14.9] | 13.6±1.6 [12.5;13.5;14.7] | 13.2±1.7 [12.1;13.1;14.3] | <0.001            |
| Hs-CRP, (mg/L)                                                      | 6.7±12.7 [1.3;2.9;7.0]        | 4.7±6.9 [1.1;2.3;5.0]     | 4.2±6.3 [1.0;2.2;4.6]     | 3.4±4.7 [0.8;1.9;3.9]     | <0.001            |
| Total cholesterol, (mg/dL)                                          | 204±47 [171;203;231]          | 211±50 [177;208;240]      | 210±50 [174;207;238]      | 221±61 [181;213;251]      | <0.001            |
| LDL cholesterol, (mg/dL)                                            | 116±39 [88;112;141]           | 119±43 [91;115;144]       | 117±42 [89;113;141]       | 122±50 [89;114;148]       | 0.15              |
| HDL cholesterol, (mg/dL)                                            | 50±16 [38;47;58]              | 51±17 [39;47;59]          | 51±18 [39;48;61]          | 56±21[42;52;67]           | <0.001            |
| Triglycerides, (mg/dL)                                              | 183±104 [113;160;224]         | 200±120 [123;169;240]     | 205±139[120;175;249]      | 209±143 [117;171;256]     | <0.001            |

Values are provided as mean ± standard deviation and [25th; 50th (median); and 75th percentiles] or as number of patients (%). % (=percentage considering missing values). In total group, for all variables displayed, number of missing values ≤2.5% (n=5039). eGFR calculated according to the CKD-EPI equation [29]. Hs-CRP and urine-albumin values that were below the lower detection limit (LOD) were replaced by LOD/√2. BMI was corrected for amputation. UACR calculated according to the following equation: Albumin in urine (mg/l) x 100 / Creatinine in urine (mg/dl) and is given in mg/g. Hypertension was defined as systolic blood pressure ≥140 mmHg and/or diastolic blood pressure ≥90 mmHg, and/or receiving antihypertensive treatment. Cardiovascular disease was defined as myocardial infarction, coronary artery bypass grafting, percutaneous transluminal coronary angioplasty, stroke, interventions at the carotid arteries.

**Supplementary Table 4:** Association of apolipoprotein A-IV with history of cancer at the baseline investigation. Data are as in model 2 from Table 2 but additionally adjusted for HDL-C, LDL-C and triglycerides.

| History of cancer                                                     |                                     | OR   | 95% CI    | p-value |
|-----------------------------------------------------------------------|-------------------------------------|------|-----------|---------|
| <b>Calculations for median of apoA-IV concentrations <sup>a</sup></b> |                                     |      |           |         |
| Model 2: 601 cases (269 above and 332 below median) <sup>b</sup>      |                                     | 0.81 | 0.67-0.98 | 0.03    |
| <b>Calculations per quartile of ApoA-IV concentrations</b>            |                                     |      |           |         |
| Model 2                                                               | Quartile 1 (163 cases) <sup>b</sup> | 1.00 |           |         |
|                                                                       | Quartile 2 (169 cases) <sup>b</sup> | 1.01 | 0.79-1.28 | 0.95    |
|                                                                       | Quartile 3 (142 cases) <sup>b</sup> | 0.82 | 0.64-1.06 | 0.13    |
|                                                                       | Quartile 4 (127 cases) <sup>b</sup> | 0.80 | 0.60-1.07 | 0.13    |

<sup>a</sup> Reference category includes apoA-IV values below median. The median apoA-IV concentration is 27.6 mg/dL. (referring to the total group of 5039 patients).

<sup>b</sup> "Cases" refers to the number of patients with a history of cancer.

Data adjusted for age, sex, eGFR<sub>creatinine</sub>, ln-urine albumin-creatinine ratio, statin use, smoking, BMI, diabetes, HDL-C, LDL-C, and triglycerides.

Abbreviations: OR, odds ratio; CI, confidence interval

**Supplementary Table 5:** Association of apolipoprotein A-IV with incident cancer without a history of cancer at the baseline investigation <sup>a</sup>. Data are as in model 2 from Table 3 but additionally adjusted for HDL-C, LDL-C and triglycerides.

| Incident cancer                                                       |                                     | HR   | 95% CI    | p-value |
|-----------------------------------------------------------------------|-------------------------------------|------|-----------|---------|
| <b>Calculations for median of apoA-IV concentrations <sup>b</sup></b> |                                     |      |           |         |
| Model 2: 360 cases (171 above and 189 below median) <sup>c</sup>      |                                     | 0.73 | 0.58-0.92 | 0.007   |
| <b>Calculations per quartile of ApoA-IV concentrations</b>            |                                     |      |           |         |
| Model 2                                                               | Quartile 1 (88 cases) <sup>c</sup>  | 1.00 |           |         |
|                                                                       | Quartile 2 (101 cases) <sup>c</sup> | 1.01 | 0.76-1.35 | 0.94    |
|                                                                       | Quartile 3 (83 cases) <sup>c</sup>  | 0.73 | 0.53-1.00 | 0.05    |
|                                                                       | Quartile 4 (88 cases) <sup>c</sup>  | 0.74 | 0.53-1.04 | 0.08    |

<sup>a</sup> Patients with a history of cancer at the time of enrollment were not considered in this analysis.

<sup>b</sup> Reference category includes apoA-IV values below median. The median apoA-IV concentration is 27.6 mg/dL (referring to the total group of 5039 patients).

<sup>c</sup> "Cases" refers to the number of patients with incident cancer events.

Data adjusted for age, sex, eGFR<sub>cystatin-C</sub>, ln-urine albumin-creatinine ratio, statin use, smoking, BMI, diabetes, HDL-C, LDL-C, and triglycerides.

Abbreviations: HR, hazard ratio; CI, confidence interval

**Supplementary Table 6:** Association of apolipoprotein A-IV with fatal cancer without a history of cancer at the baseline investigation <sup>a</sup>. Data are as in model 2 from Table 4 but additionally adjusted for HDL-C, LDL-C and triglycerides.

| Fatal cancer                                                         |                                    | HR   | 95% CI    | p-value |
|----------------------------------------------------------------------|------------------------------------|------|-----------|---------|
| <b>Calculations per 10 mg/dL increment of apoA-IV concentrations</b> |                                    |      |           |         |
| Model 2: 59 cases <sup>b</sup>                                       |                                    | 0.62 | 0.44-0.88 | 0.007   |
| <b>Calculations per quartile of ApoA-IV concentrations</b>           |                                    |      |           |         |
| Model 2                                                              | Quartile 1 (19 cases) <sup>b</sup> | 1.00 |           |         |
|                                                                      | Quartile 2 (10 cases) <sup>b</sup> | 0.43 | 0.20-0.92 | 0.03    |
|                                                                      | Quartile 3 (19 cases) <sup>b</sup> | 0.66 | 0.34-1.28 | 0.22    |
|                                                                      | Quartile 4 (11 cases) <sup>b</sup> | 0.34 | 0.15-0.78 | 0.01    |

<sup>a</sup> Patients with a history of cancer at the time of enrollment were not considered in this analysis.

<sup>b</sup> "Cases" refers to the number of patients with fatal cancer events.

Data adjusted for age, sex, eGFR<sub>cystatin-C</sub>, ln-urine albumin-creatinine ratio, statin use, smoking, BMI, diabetes, HDL-C, LDL-C, and triglycerides.

Abbreviations: HR, hazard ratio; CI, confidence interval



**Supplementary Table 7:** Association of apolipoprotein A-IV with incident cancer during the prospective follow-up. Analysis includes also patients who already had a history of cancer at the baseline investigation.

| Incident cancer                                                       |                                     | HR   | 95% CI    | p-value |
|-----------------------------------------------------------------------|-------------------------------------|------|-----------|---------|
| <b>Calculations for median of apoA-IV concentrations <sup>a</sup></b> |                                     |      |           |         |
| Model 1: 445 cases (206 above and 239 below median) <sup>b</sup>      |                                     | 0.73 | 0.60-0.90 | 0.003   |
| Model 2: 438 cases (202 above and 136 below median) <sup>b</sup>      |                                     | 0.73 | 0.59-0.89 | 0.003   |
| <b>Calculations per quartile of ApoA-IV concentrations</b>            |                                     |      |           |         |
| Model 1                                                               | Quartile 1 (107 cases) <sup>b</sup> | 1.00 |           |         |
|                                                                       | Quartile 2 (132 cases) <sup>b</sup> | 1.06 | 0.82-1.38 | 0.64    |
|                                                                       | Quartile 3 (105 cases) <sup>b</sup> | 0.78 | 0.59-1.03 | 0.08    |
|                                                                       | Quartile 4 (101 cases) <sup>b</sup> | 0.74 | 0.55-1.00 | 0.05    |
| Model 2                                                               | Quartile 1 (105 cases) <sup>b</sup> | 1.00 |           |         |
|                                                                       | Quartile 2 (131 cases) <sup>b</sup> | 1.08 | 0.83-1.39 | 0.58    |
|                                                                       | Quartile 3 (102 cases) <sup>b</sup> | 0.77 | 0.58-1.03 | 0.07    |
|                                                                       | Quartile 4 (100 cases) <sup>b</sup> | 0.74 | 0.55-1.01 | 0.06    |

<sup>a</sup> Reference category includes apoA-IV values below median The median apoA-IV concentration is 27.6 mg/dL (referring to the total group of 5039 patients)

<sup>b</sup> "Cases" refers to the number of patients with incident cancer events. Differences in number of cases between model 1 and 2 are explained by few patients with some missing covariates for model 2.

Model 1: adjusted for age, sex, eGFR<sub>cystatin-C</sub>, ln-urine albumin-creatinine ratio

Model 2: as model 1 plus statin use, smoking, BMI, diabetes, history of cancer

Abbreviations: HR, hazard ratio; CI, confidence interval

**Supplementary Table 8:** Association of apolipoprotein A-IV with fatal cancer during the prospective follow-up. Analysis includes also patients who already had a history of cancer at the baseline investigation.

| Fatal cancer <sup>a</sup>                                            |                                    | HR   | 95% CI    | p-value |
|----------------------------------------------------------------------|------------------------------------|------|-----------|---------|
| <b>Calculations per 10 mg/dL increment of apoA-IV concentrations</b> |                                    |      |           |         |
| Model 1: 95 cases <sup>a</sup>                                       |                                    | 0.72 | 0.55-0.95 | 0.02    |
| Model 2: 92 cases <sup>a</sup>                                       |                                    | 0.74 | 0.57-0.98 | 0.04    |
| <b>Calculations per quartile of apoA-IV concentrations</b>           |                                    |      |           |         |
| Model 1                                                              | Quartile 1 (31 cases) <sup>a</sup> | 1.00 |           |         |
|                                                                      | Quartile 2 (16 cases) <sup>a</sup> | 0.43 | 0.24-0.79 | 0.007   |
|                                                                      | Quartile 3 (28 cases) <sup>a</sup> | 0.69 | 0.41-1.18 | 0.18    |
|                                                                      | Quartile 4 (20 cases) <sup>a</sup> | 0.50 | 0.27-0.93 | 0.03    |
| Model 2                                                              | Quartile 1 (29 cases) <sup>a</sup> | 1.00 |           |         |
|                                                                      | Quartile 2 (16 cases) <sup>a</sup> | 0.47 | 0.26-0.87 | 0.02    |
|                                                                      | Quartile 3 (27 cases) <sup>a</sup> | 0.75 | 0.43-1.29 | 0.30    |
|                                                                      | Quartile 4 (20 cases) <sup>a</sup> | 0.55 | 0.29-1.05 | 0.07    |

<sup>a</sup>"Cases" refers to the number of patients with fatal cancer events. Differences in number of cases between model 1 and 2 are explained by few patients with some missing covariates for model 2.

Model 1: adjusted for age, sex, eGFR<sub>cystatin-C</sub>, ln-urine albumin-creatinine ratio

Model 2: as model 1 plus statin use, smoking, BMI, diabetes, history of cancer

Abbreviations: HR, hazard ratio; CI, confidence interval

**Supplementary Table 9:** Association of apolipoprotein A-IV with history of cancer. Data are as in model 2 from Table 2 but additionally adjusted for hs-CRP.

|                                                                       | OR                | 95% CI    | p-value |
|-----------------------------------------------------------------------|-------------------|-----------|---------|
| <b>Calculations for median of apoA-IV concentrations <sup>a</sup></b> |                   |           |         |
| Model 2: 604 cases (270 above and 334 below median) <sup>b</sup>      | 0.85              | 0.71-1.04 | 0.11    |
| Model 2: 603 cases (269 above and 334 below median) <sup>b</sup>      | 0.81 <sup>¥</sup> | 0.67-0.98 | 0.03    |
| <b>Calculations per quartile of ApoA-IV concentrations</b>            |                   |           |         |
| Model 2                                                               |                   |           |         |
| Quartile 1 (163 cases) <sup>b</sup>                                   | 1.00              |           |         |
| Quartile 2 (171 cases) <sup>b</sup>                                   | 1.06              | 0.84-1.35 | 0.63    |
| Quartile 3 (142 cases) <sup>b</sup>                                   | 0.88              | 0.68-1.13 | 0.32    |
| Quartile 4 (128 cases) <sup>b</sup>                                   | 0.89              | 0.67-1.19 | 0.43    |
| Model 2                                                               |                   |           |         |
| Quartile 1 (163 cases) <sup>b</sup>                                   | 1.00              |           |         |
| Quartile 2 (171 cases) <sup>b</sup>                                   | 1.03 <sup>c</sup> | 0.81-1.30 | 0.83    |
| Quartile 3 (142 cases) <sup>b</sup>                                   | 0.83 <sup>c</sup> | 0.64-1.07 | 0.16    |
| Quartile 4 (127 cases) <sup>b</sup>                                   | 0.81 <sup>c</sup> | 0.61-1.07 | 0.14    |

<sup>a</sup> Reference category includes apoA-IV values below median. The median apoA-IV concentration is 27.6 mg/dL (referring to the total group of 5039 patients). Differences in number of cases between the two models are explained by few patients with some missing covariates for model 2 adjusted for GFR<sub>creatinine</sub>.

<sup>b</sup> "Cases" refers to the number of patients with a history of cancer.

Data adjusted for age, sex, eGFR<sub>cystatin-C</sub>, ln-urine albumin-creatinine ratio, statin use, smoking, BMI, diabetes and ln-hs-CRP

<sup>c</sup> adjusted for eGFR<sub>creatinine</sub> instead of eGFR<sub>cystatin-C</sub>

Abbreviations: OR, odds ratio; CI, confidence interval

**Supplementary Table 10:** Association of apolipoprotein A-IV with incident cancer without a history of cancer at the baseline investigation <sup>a</sup>. Data are as in model 2 from Table 3 but additionally adjusted for hs-CRP.

| Incident cancer                                                       |                                     | HR   | 95% CI    | p-value |
|-----------------------------------------------------------------------|-------------------------------------|------|-----------|---------|
| <b>Calculations for median of apoA-IV concentrations <sup>b</sup></b> |                                     |      |           |         |
| Model 2: 362 cases (171 above and 191 below median) <sup>c</sup>      |                                     | 0.74 | 0.59-0.93 | 0.01    |
| <b>Calculations per quartile of ApoA-IV concentrations</b>            |                                     |      |           |         |
| Model 2                                                               | Quartile 1 (88 cases) <sup>c</sup>  | 1.00 |           |         |
|                                                                       | Quartile 2 (103 cases) <sup>c</sup> | 1.05 | 0.78-1.40 | 0.77    |
|                                                                       | Quartile 3 (83 cases) <sup>c</sup>  | 0.75 | 0.55-1.03 | 0.07    |
|                                                                       | Quartile 4 (88 cases) <sup>c</sup>  | 0.78 | 0.57-1.10 | 0.15    |

<sup>a</sup> Patients with a history of cancer at the time of enrollment were not considered in this analysis.

<sup>b</sup> Reference category includes apoA-IV values below median. The median apoA-IV concentration is 27.6 mg/dL (referring to the total group of 5039 patients).

<sup>c</sup> "Cases" refers to the number of patients with fatal cancer events.

Data adjusted for age, sex, eGFR<sub>cystatin-C</sub>, ln-urine albumin-creatinine ratio, statin use, smoking, BMI, diabetes, and ln-hs-CRP

Abbreviations: HR, hazard ratio; CI, confidence interval

**Supplementary Table 11:** Association of apolipoprotein A-IV with fatal cancer without a history of cancer at the baseline investigation <sup>a</sup>. Data are as in model 2 from Table 4 but additionally adjusted for hs-CRP.

| Fatal cancer                                                         |                                    | HR   | 95% CI    | p-value |
|----------------------------------------------------------------------|------------------------------------|------|-----------|---------|
| <b>Calculations per 10 mg/dL increment of apoA-IV concentrations</b> |                                    |      |           |         |
| Model 2: 60 cases <sup>b</sup>                                       |                                    | 0.65 | 0.45-0.92 | 0.02    |
| <b>Calculations per quartile of ApoA-IV concentrations</b>           |                                    |      |           |         |
| Model 2                                                              | Quartile 1 (19 cases) <sup>b</sup> | 1.00 |           |         |
|                                                                      | Quartile 2 (11 cases) <sup>b</sup> | 0.48 | 0.23-1.01 | 0.05    |
|                                                                      | Quartile 3 (19 cases) <sup>b</sup> | 0.69 | 0.36-1.35 | 0.28    |
|                                                                      | Quartile 4 (11 cases) <sup>b</sup> | 0.38 | 0.17-0.88 | 0.02    |

<sup>a</sup> Patients with a history of cancer at the time of enrollment were not considered in this analysis.

<sup>b</sup> "Cases" refers to the number of patients with fatal cancer events.

Data adjusted for age, sex, eGFR<sub>cystatin-C</sub>, ln-urine albumin-creatinine ratio, statin use, smoking, BMI, diabetes, and ln-hs-CRP

Abbreviations: HR, hazard ratio; CI, confidence interval

**Supplementary Table 12:** Association of apolipoprotein A-IV with incident cancer during the prospective follow-up without a history of cancer at the baseline investigation based on subdistribution hazard ratio (SHR) models (4424 out of 5039 patients)<sup>a</sup>

| Incident cancer                                                      |                                     | SHR  | 95% CI    | p-value |
|----------------------------------------------------------------------|-------------------------------------|------|-----------|---------|
| <b>Calculations for median of apoA-IV concentrations<sup>b</sup></b> |                                     |      |           |         |
| Model 1: 368 cases(174 above and 194 below median) <sup>c</sup>      |                                     | 0.76 | 0.61-0.95 | 0.02    |
| Model 2: 362 cases(174 above and 194 below median) <sup>c</sup>      |                                     | 0.77 | 0.62-0.96 | 0.02    |
| <b>Calculations per quartile of ApoA-IV concentrations</b>           |                                     |      |           |         |
| Model 1                                                              | Quartile 1 (90 cases) <sup>c</sup>  | 1.00 |           |         |
|                                                                      | Quartile 2 (104 cases) <sup>c</sup> | 1.04 | 0.78-1.38 | 0.80    |
|                                                                      | Quartile 3 (85 cases) <sup>c</sup>  | 0.77 | 0.56-1.04 | 0.09    |
|                                                                      | Quartile 4 (89 cases) <sup>c</sup>  | 0.79 | 0.57-1.10 | 0.16    |
| Model 2                                                              | Quartile 1 (88 cases) <sup>c</sup>  | 1.00 |           |         |
|                                                                      | Quartile 2 (103 cases) <sup>c</sup> | 1.05 | 0.79-1.40 | 0.73    |
|                                                                      | Quartile 3 (83 cases) <sup>c</sup>  | 0.76 | 0.56-1.04 | 0.08    |
|                                                                      | Quartile 4 (88 cases) <sup>c</sup>  | 0.79 | 0.57-1.11 | 0.18    |

<sup>a</sup> Patients with a history of cancer at the time of enrollment were not considered in this analysis.

<sup>b</sup> Reference category includes apoA-IV values below median. The median apoA-IV concentration is 27.6 mg/dL (referring to the total group of 5039 patients).

<sup>c</sup> "Cases" refers to the number of patients with incident cancer events. Differences in number of cases between model 1 and 2 are explained by patients with few missing covariates for model 2.

Model 1: adjusted for age, sex, eGFR<sub>cystatin-C</sub>, ln-urine albumin-creatinine ratio

Model 2: as model 1 plus statin use, smoking, BMI, and diabetes

Abbreviations: SHR, subdistribution hazard ratio; CI, confidence interval

**Supplementary Table 13:** Association of apolipoprotein A-IV with fatal cancer during the prospective follow-up without a history of cancer at the baseline investigation based on subdistribution hazard ratio (SHR) models (4424 out of 5039 patients)<sup>a</sup>

| Fatal cancer                                                         |                                    | SHR  | 95% CI    | p-value |
|----------------------------------------------------------------------|------------------------------------|------|-----------|---------|
| <b>Calculations per 10 mg/dL increment of apoA-IV concentrations</b> |                                    |      |           |         |
| Model 1: 62 cases <sup>b</sup>                                       |                                    | 0.63 | 0.45-0.89 | 0.009   |
| Model 2: 60 cases <sup>b</sup>                                       |                                    | 0.64 | 0.47-0.88 | 0.006   |
| <b>Calculations per quartile of ApoA-IV concentrations</b>           |                                    |      |           |         |
| Model 1                                                              | Quartile 1 (21 cases) <sup>b</sup> | 1.00 |           |         |
|                                                                      | Quartile 2 (11 cases) <sup>b</sup> | 0.44 | 0.21-0.91 | 0.03    |
|                                                                      | Quartile 3 (19 cases) <sup>b</sup> | 0.65 | 0.34-1.23 | 0.18    |
|                                                                      | Quartile 4 (11 cases) <sup>b</sup> | 0.35 | 0.15-0.81 | 0.01    |
| Model 2                                                              | Quartile 1 (19 cases) <sup>b</sup> | 1.00 |           |         |
|                                                                      | Quartile 2 (11 cases) <sup>b</sup> | 0.49 | 0.23-1.03 | 0.06    |
|                                                                      | Quartile 3 (19 cases) <sup>b</sup> | 0.71 | 0.37-1.38 | 0.31    |
|                                                                      | Quartile 4 (11 cases) <sup>b</sup> | 0.39 | 0.17-0.90 | 0.03    |

<sup>a</sup> Patients with a history of cancer at the time of enrollment were not considered in this analysis.

<sup>b</sup> "Cases" refers to the number of patients with fatal cancer events. Differences in number of cases between model 1 and 2 are explained by few patients with some missing covariates for model 2. Model 1: adjusted for age, sex, eGFR<sub>cystatin-C</sub>, ln-urine albumin-creatinine ratio

Model 2: as model 1 plus statin use, smoking, BMI, and diabetes

Abbreviations: SHR, subdistribution hazard ratio; CI, confidence interval

## References

1. Dieplinger H, Ankerst DP, Burges A, Lenhard M, Lingenhel A, Fineder L, Buchner H, Stieber P: **Afamin and apolipoprotein A-IV: novel protein markers for ovarian cancer.** *Cancer Epidemiol Biomarkers Prev* 2009, **18**:1127-1133.
2. Lorkova L, Pospisilova J, Lacheta J, Leahomschi S, Zivny J, Cibula D, Zivny J, Petrak J: **Decreased concentrations of retinol-binding protein 4 in sera of epithelial ovarian cancer patients: a potential biomarker identified by proteomics.** *Oncol Rep* 2012, **27**(2):318-324.
3. Li L, Xu Y, Yu CX: **Proteomic analysis of serum of women with elevated Ca-125 to differentiate malignant from benign ovarian tumors.** *Asian Pac J Cancer Prev* 2012, **13**(7):3265-3270.
4. Timms JF, Arslan-Low E, Kabir M, Worthington J, Camuzeaux S, Sinclair J, Szaub J, Afrough B, Podust VN, Fourkala EO *et al*: **Discovery of serum biomarkers of ovarian cancer using complementary proteomic profiling strategies.** *Proteomics Clin Appl* 2014, **8**:982-993.
5. Rauniyar N, Peng G, Lam TT, Zhao H, Mor G, Williams KR: **Data-Independent Acquisition and Parallel Reaction Monitoring Mass Spectrometry Identification of Serum Biomarkers for Ovarian Cancer.** *Biomark Insights* 2017, **12**:1177271917710948.
6. Jeong DH, Kim HK, Prince AE, Lee DS, Kim YN, Han J, Kim KT: **Plasma proteomic analysis of patients with squamous cell carcinoma of the uterine cervix.** *J Gynecol Oncol* 2008, **19**(3):173-180.
7. Wang YS, Cao R, Jin H, Huang YP, Zhang XY, Cong Q, He YF, Xu CJ: **Altered protein expression in serum from endometrial hyperplasia and carcinoma patients.** *J Hematol Oncol* 2011, **4**:15.
8. Kawakami T, Hoshida Y, Kanai F, Tanaka Y, Tateishi K, Ikenoue T, Obi S, Sato S, Teratani T, Shiina S *et al*: **Proteomic analysis of sera from hepatocellular carcinoma patients after radiofrequency ablation treatment.** *Proteomics* 2005, **5**:4287-4295.
9. Pleguezuelo M, Lopez-Sanchez LM, Rodriguez-Ariza A, Montero JL, Briceno J, Ciria R, Muntane J, de la Mata M: **Proteomic analysis for developing new biomarkers of hepatocellular carcinoma.** *World J Hepatol* 2010, **2**(3):127-135.
10. Sugimoto K, Shiraki K, Takei Y, Ito M, Nobori T, Suzuki H, Dissanayaka SK, Meno K, Asashima M, Uchida K: **Serum protein isoform profiles indicate the progression of hepatitis C virus-induced liver diseases.** *Int J Mol Med* 2013, **31**(4):943-950.
11. Bharali D, Banerjee BD, Bharadwaj M, Husain SA, Kar P: **Expression analysis of apolipoproteins AI & AIV in hepatocellular carcinoma: A protein-based hepatocellular carcinoma-associated study.** *Indian J Med Res* 2018, **147**(4):361-368.
12. Son KH, Ahn CB, Kim HJ, Kim JS: **Quantitative proteomic analysis of bile in extrahepatic cholangiocarcinoma patients.** *J Cancer* 2020, **11**(14):4073-4080.
13. Abulaizi M, Tomonaga T, Satoh M, Sogawa K, Matsushita K, Kodera Y, Obul J, Takano S, Yoshitomi H, Miyazaki M *et al*: **The application of a three-step proteome analysis for identification of new biomarkers of pancreatic cancer.** *Int J Proteomics* 2011, **2011**:628787.
14. Park J, Lee E, Park KJ, Park HD, Kim JW, Woo HI, Lee KH, Lee KT, Lee JK, Park JO *et al*: **Large-scale clinical validation of biomarkers for pancreatic cancer using a mass spectrometry-based proteomics approach.** *Oncotarget* 2017, **8**:42761-42771.
15. Peng H, Pan S, Yan Y, Brand RE, Petersen GM, Chari ST, Lai LA, Eng JK, Brentnall TA, Chen R: **Systemic Proteome Alterations Linked to Early Stage Pancreatic Cancer in Diabetic Patients.** *Cancers (Basel)* 2020, **12**(6):1534.



16. Liu W, Liu B, Cai Q, Li J, Chen X, Zhu Z: **Proteomic identification of serum biomarkers for gastric cancer using multi-dimensional liquid chromatography and 2D differential gel electrophoresis.** *Clin Chim Acta* 2012, **413**(13-14):1098-1106.
17. Sugimachi K, Yamaguchi R, Eguchi H, Ueda M, Niida A, Sakimura S, Hirata H, Uchi R, Shinden Y, Iguchi T *et al*: **8q24 Polymorphisms and Diabetes Mellitus Regulate Apolipoprotein A-IV in Colorectal Carcinogenesis.** *Ann Surg Oncol* 2016, **23**(Suppl 4):546-551.
18. Ahn SB, Sharma S, Mohamedali A, Mahboob S, Redmond WJ, Pascovici D, Wu JX, Zaw T, Adhikari S, Vaibhav V *et al*: **Potential early clinical stage colorectal cancer diagnosis using a proteomics blood test panel.** *Clin Proteomics* 2019, **16**:34.
19. Karczmarski J, Rubel T, Mikula M, Wolski J, Rutkowski A, Zagorowicz E, Dadlez M, Ostrowski J: **Pre-analytical-related variability influencing serum peptide profiles demonstrated in a mass spectrometry-based search for colorectal and prostate cancer biomarkers.** *Acta Biochimica Polnica* 2013, **60**:417-425.
20. Chang SC, Lin WL, Chang YF, Lee CT, Wu JS, Hsu PH, Chang CF: **Glycoproteomic identification of novel plasma biomarkers for oral cancer.** *J Food Drug Anal* 2019, **27**(2):483-493.
21. Abdullah MI, Lee CC, Mat Junit S, Ng KL, Hashim OH: **Tissue and serum samples of patients with papillary thyroid cancer with and without benign background demonstrate different altered expression of proteins.** *PeerJ* 2016, **4**:e2450.
22. Farrokhi Yekta R, Arefi Oskouie A, Rezaei Tavirani M, Mohajeri-Tehrani MR, Soroush AR: **Decreased apolipoprotein A4 and increased complement component 3 as potential markers for papillary thyroid carcinoma: A proteomic study.** *Int J Biol Markers* 2018, **33**(4):455-462.
23. Li D, Wu J, Liu Z, Qiu L, Zhang Y: **Novel circulating protein biomarkers for thyroid cancer determined through data-independent acquisition mass spectrometry.** *PeerJ* 2020, **8**:e9507.
24. Dowling P, O'Driscoll L, Meleady P, Henry M, Roy S, Ballot J, Moriarty M, Crown J, Clynes M: **2-D difference gel electrophoresis of the lung squamous cell carcinoma versus normal sera demonstrates consistent alterations in the levels of ten specific proteins.** *Electrophoresis* 2007, **28**(23):4302-4310.
25. Okano T, Seike M, Kuribayashi H, Soeno C, Ishii T, Kida K, Gemma A: **Identification of haptoglobin peptide as a novel serum biomarker for lung squamous cell carcinoma by serum proteome and peptidome profiling.** *Int J Oncol* 2016, **48**(3):945-952.
26. Zheng RJ, Wu RJ, Ma XD: **Serum proteomic spectral characteristics of acute myeloid leukemia and their clinical significance.** *Genet Mol Res* 2017, **16**.
27. Miyauchi E, Furuta T, Ohtsuki S, Tachikawa M, Uchida Y, Sabit H, Obuchi W, Baba T, Watanabe M, Terasaki T *et al*: **Identification of blood biomarkers in glioblastoma by SWATH mass spectrometry and quantitative targeted absolute proteomics.** *PLoS ONE* 2018, **13**:e0193799.
28. Soukup V, Capoun O, Pesl M, Vavrova L, Sobotka R, Levova K, Hanus T, Zima T, Kalousova M: **The significance of calprotectin, CD147, APOA4 and DJ-1 in non-invasive detection of urinary bladder carcinoma.** *Neoplasma* 2019, **66**(6):1019-1023.
29. Levey AS, Inker LA, Coresh J: **GFR estimation: from physiology to public health.** *Am J Kidney Dis* 2014, **63**(5):820-834.
